# Supplementary material for: Edible cannabis for chronic low back pain: associations with pain, mood, and intoxication
Source: PubMed Central journal article supplement (PMC11458467; doi:10.3389/fphar.2024.1464005), 2024-09-24
Supplement: DataSheet1.pdf [file DataSheet1.pdf]

Supplementary Materials

**Supplementary Table 1. Plasma Cannabinoid Concentration by Timepoint**

|                    | CBD Group                |                          |                           | THC + CBD Group        |                          |                        | THC Group              |                          |                        |
|--------------------|--------------------------|--------------------------|---------------------------|------------------------|--------------------------|------------------------|------------------------|--------------------------|------------------------|
|                    | THC<br>(ng/mL)           | 11-OH-<br>THC<br>(ng/mL) | CBD<br>(ng/mL)            | THC<br>(ng/mL)         | 11-OH-<br>THC<br>(ng/mL) | CBD<br>(ng/mL)         | THC<br>(ng/mL)         | 11-OH-<br>THC<br>(ng/mL) | CBD<br>(ng/mL)         |
| Baseline           | 0.01<br>(0.06)           | 0.00<br>(0.00)           | 0.02<br>(0.12)            | 0.02<br>(0.2)          | 0.00<br>(0.00)           | 0.02<br>(0.17)         | 0.04<br>(0.15)         | 0.00<br>(0.00)           | 0.05<br>(0.24)         |
| Pre-use            | 0.02<br>(0.16)           | 0.05<br>(0.34)           | <b>0.74*</b><br>(2.01)    | 0.09<br>(0.46)         | 0.07<br>(0.41)           | <b>0.21*</b><br>(0.47) | 0.19<br>(0.51)         | 0.11<br>(0.52)           | 0.12<br>(0.39)         |
| 1-hour<br>post-use | <b>0.25**†</b><br>(0.55) | <b>0.28**†</b><br>(1.19) | <b>7.02**†</b><br>(10.49) | <b>3.43*</b><br>(4.30) | <b>2.79*</b><br>(2.86)   | <b>3.55*</b><br>(5.84) | <b>4.21†</b><br>(4.05) | <b>2.75†</b><br>(2.56)   | <b>1.13†</b><br>(2.42) |
| 2-hour<br>post-use | <b>0.13**†</b><br>(0.29) | <b>0.07**†</b><br>(0.25) | 5.23<br>(7.09)            | <b>2.03*</b><br>(2.52) | <b>1.94*</b><br>(2.07)   | 3.14<br>(6.55)         | <b>2.16†</b><br>(2.07) | <b>1.60†</b><br>(1.60)   | 3.37<br>(12.30)        |

*Note.* Plasma cannabinoid concentrations are reported in nanograms per milliliter (ng/mL) at baseline, pre-use, 1-hour post-use, and 2-hours, post-use for each product group (CBD, THC + CBD, and THC). Data are reported as mean (standard deviation). \* = significant ( $p < .05$ ) group difference between the CBD and THC + CBD groups, † = significant ( $p < .05$ ) group difference between the CBD and THC groups, ‡ = significant ( $p < .05$ ) group difference between the THC + CBD and THC groups.

**Supplementary Table 2. 2 Week Average Pain Intensity and Pain Interference ANOVA Models**

| Predictors                         | Average Pain Intensity |                        |                 | Pain Interference |                        |                 | Perceived Change in Pain |                        |                 |
|------------------------------------|------------------------|------------------------|-----------------|-------------------|------------------------|-----------------|--------------------------|------------------------|-----------------|
|                                    | <i>F</i>               | Part $\eta^2$ [95% CI] | <i>p</i> -value | <i>F</i>          | Part $\eta^2$ [95% CI] | <i>p</i> -value | <i>F</i>                 | Part $\eta^2$ [95% CI] | <i>p</i> -value |
| <b>Extended models</b>             |                        |                        |                 |                   |                        |                 |                          |                        |                 |
| Age                                | 6.20                   | 0.02 [0.00,0.05]       | .01             | 15.48             | 0.04 [0.01,0.08]       | <.001           | 0.78                     | 0.00 [0.00,0.03]       | .38             |
| Education                          | 10.72                  | 0.03 [0.01, 0.06]      | .001            | 0.40              | 0.00 [0.00, 0.02]      | .52             | 0.21                     | 0.00 [0.00,0.03]       | .65             |
| Pain Expectancy                    | 7.03                   | 0.02 [0.00, 0.05]      | <.01            | 3.23              | 0.01 [0.00, 0.03]      | .07             | 1.57                     | 0.01 [0.00,0.04]       | .21             |
| Group                              | 5.74                   | 0.01 [0.00, 0.04]      | .02             | 0.62              | 0.01 [0.00, 0.03]      | .43             | 1.76                     | 0.01 [0.00,0.05]       | .19             |
| Time                               | 18.14                  | 0.04 [0.01, 0.08]      | <.001           | 9.20              | 0.02 [0.00, 0.05]      | <.01            | -                        | -                      | -               |
| Frequency of Use                   | 2.21                   | 0.00 [0.00, 0.02]      | .14             | 0.07              | 0.00 [0.00, 0.02]      | .79             | 5.21                     | 0.02 [0.00,0.08]       | .02             |
| Group x Time                       | 0.25                   | 0.00 [0.00, 0.01]      | .62             | 0.11              | 0.00[0.00, 0.01]       | .74             | -                        | -                      | -               |
| Group x Frequency of Use           | 3.32                   | 0.01 [0.00, 0.03]      | .07             | 0.37              | 0.00 [0.00, 0.01]      | .55             | 1.11                     | 0.00 [0.00,0.04]       | .29             |
| Frequency of Use x Time            | 1.13                   | 0.00 [0.00, 0.02]      | .29             | 0.41              | 0.00 [0.00, 0.01]      | .52             | -                        | -                      | -               |
| Group x Frequency of Use<br>x Time | 0.03                   | 0.00 [0.00, 0.01]      | .86             | 0.01              | 0.00 [0.00, 0.00]      | .92             | -                        | -                      | -               |

*Note.* Supplementary Table 2 provides the full ANOVA results between average pain intensity, pain interference, and perceived change in pain over the 2 week period. The perceived change in pain is only collected at one timepoint, therefore no effects of time or its interactions are included in this model.

### Supplementary Figure 1.

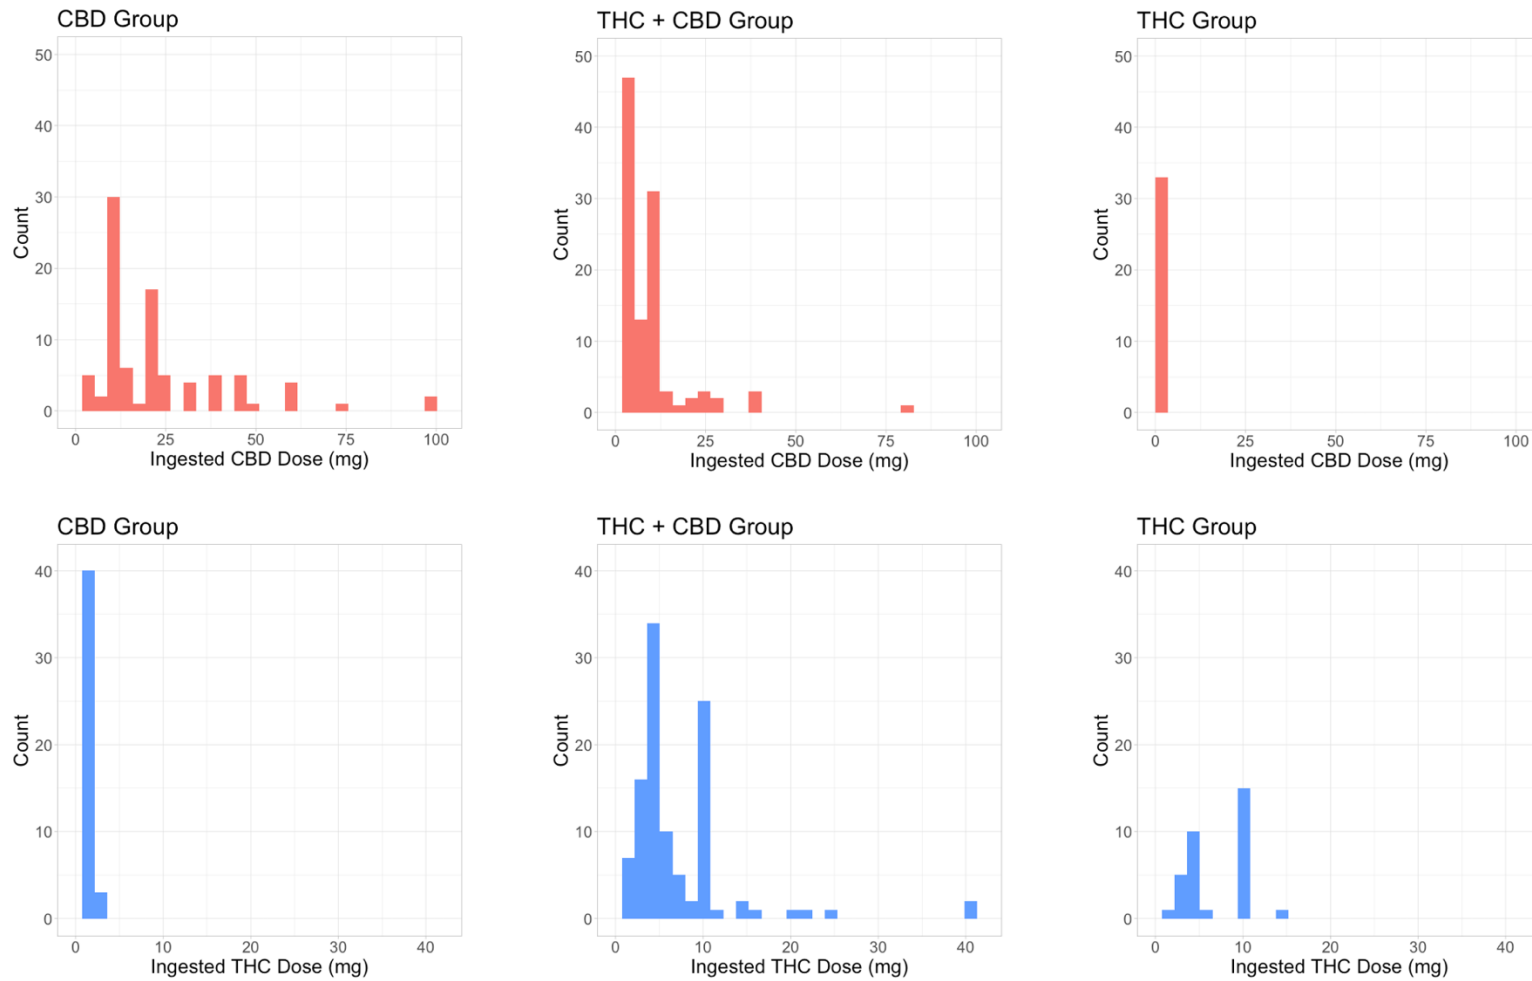

*Note.* Supplementary Figure 1 includes six bar graphs which depicts the ingested dose (mg) of CBD (red) and THC (blue) for each cannabis product group (CBD, THC + CBD, and THC) during the acute-use time point which took place in our mobile pharmacology laboratory.
